# Supplementary material for: Prognostic significance of perioperative circulating CD56bright NK cell and recovery of NK cell activity in patients with colorectal cancer undergoing radical surgery
Source: PubMed Central journal article supplement — Transl Oncol. 2024 Dec 9;52:102198. doi: 10.1016/j.tranon.2024.102198 (PMC11683267; doi:10.1016/j.tranon.2024.102198), 2024-12-09

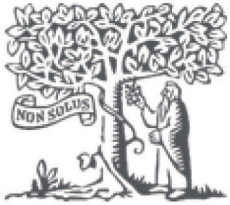

ELSEVIER

# Certificate of Elsevier Language Editing Services

The following article was edited by Elsevier Language Editing Services:  
"Prognostic significance of perioperative circulating CD56 bright NK  
cell and recovery of NK cell activity in patients with colorectal cancer  
undergoing radical surgery"

Authored by:

Hung-Chih Hsu

Date: 03-Oct-2024

Serial number: ASLEEX1079943

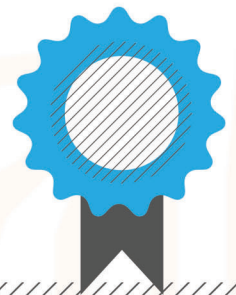

Supplement: mmc1.pdf [file mmc1.pdf]
