# Supplementary material for: Prognostic significance of perioperative circulating CD56bright NK cell and recovery of NK cell activity in patients with colorectal cancer undergoing radical surgery
Source: PubMed Central journal article supplement — Transl Oncol. 2024 Dec 9;52:102198. doi: 10.1016/j.tranon.2024.102198 (PMC11683267; doi:10.1016/j.tranon.2024.102198), 2024-12-09
Supplement: mmc3.pdf [file mmc3.pdf]

Supplementary Table 1. Median NK cell-secreted IFN- $\gamma$  (pg/ml) among distinct group

| Groups       | Time points     | Median | 95% CI         |
|--------------|-----------------|--------|----------------|
| All patient  | Baseline (n=45) | 125.8  | 75.2 to 163.4  |
|              | POD3 (n=43)     | 20.9   | 16.1 to 30.2   |
|              | POD30 (n=45)    | 190.1  | 126.5 to 503.4 |
| Stage I/II   | Baseline (n=23) | 118.9  | 41.1 to 167.2  |
|              | POD3 (n=22)     | 18.33  | 3.9 to 33.1    |
|              | POD30 (n=23)    | 143.7  | 61.6 to 500.3  |
| Stage III/IV | Baseline (n=22) | 141.5  | 50.4 to 234    |
|              | POD3 (n=21)     | 21.01  | 17 to 44.9     |
|              | POD30 (n=22)    | 356.5  | 126.5 to 764.1 |
| Low risk     | Baseline (n=11) | 118.9  | 40.6 to 466.8  |
|              | POD3 (n=11)     | 22.46  | 2.3 to 36.4    |
|              | POD30 (n=11)    | 165    | 41.4 to 838.4  |
| High risk    | Baseline (n=34) | 127.8  | 65.4 to 213.5  |
|              | POD3 (n=32)     | 20.32  | 16.1 to 35.6   |
|              | POD30 (n=34)    | 317.7  | 92.2 to 537.2  |

CI, confidence interval; POD, postoperative days
